# Supplementary material for: Facile synthesis of a Ru-dispersed N-doped carbon framework catalyst for electrochemical nitrogen reduction
Source: Royal Society of Chemistry journal article supplement (doi:10.1039/c9cy02500f), 2020-01-01
Supplement: c9cy02500f1.pdf [file c9cy02500f1.pdf]

## Facile synthesis of a Ru dispersed N-doped carbon framework catalyst for electrochemical nitrogen reduction

Ziqi Zhang<sup>a</sup>, Kaida Yao<sup>a</sup>, Linchuan Cong<sup>a</sup>, Zhuochen Yu<sup>a</sup>, Lina Qu<sup>a</sup>, Weimin Huang<sup>\*ab</sup>

*a.College of Chemistry, Jilin University, Changchun 130012, China.*

*E-mail: huangwm@jlu.edu.cn*

*b.Key Laboratory of Physics and Technology for Advanced Batteries of Ministry of Education, Jilin University, Changchun 130012, China*

\*Corresponding Author E-mail address: huangwm@jlu.edu.cn (W. Huang).

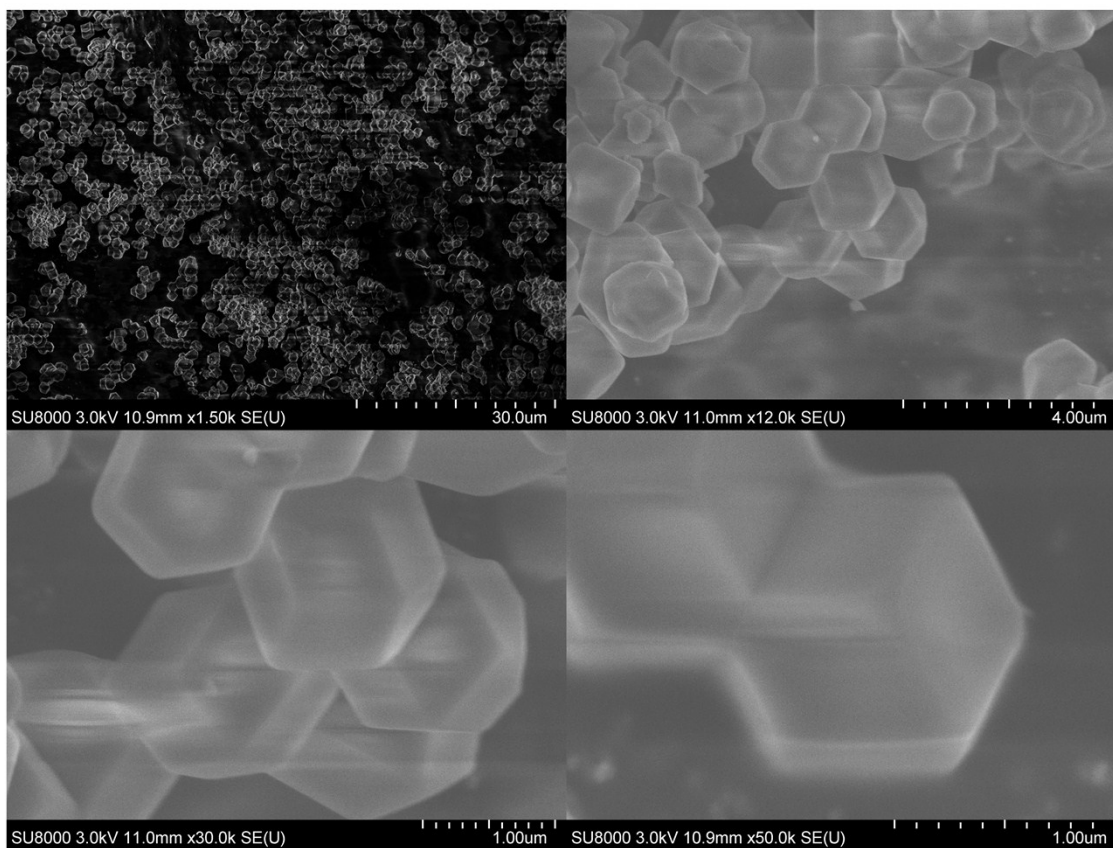

**Figure.S1** The SEM images of ZIF-8.

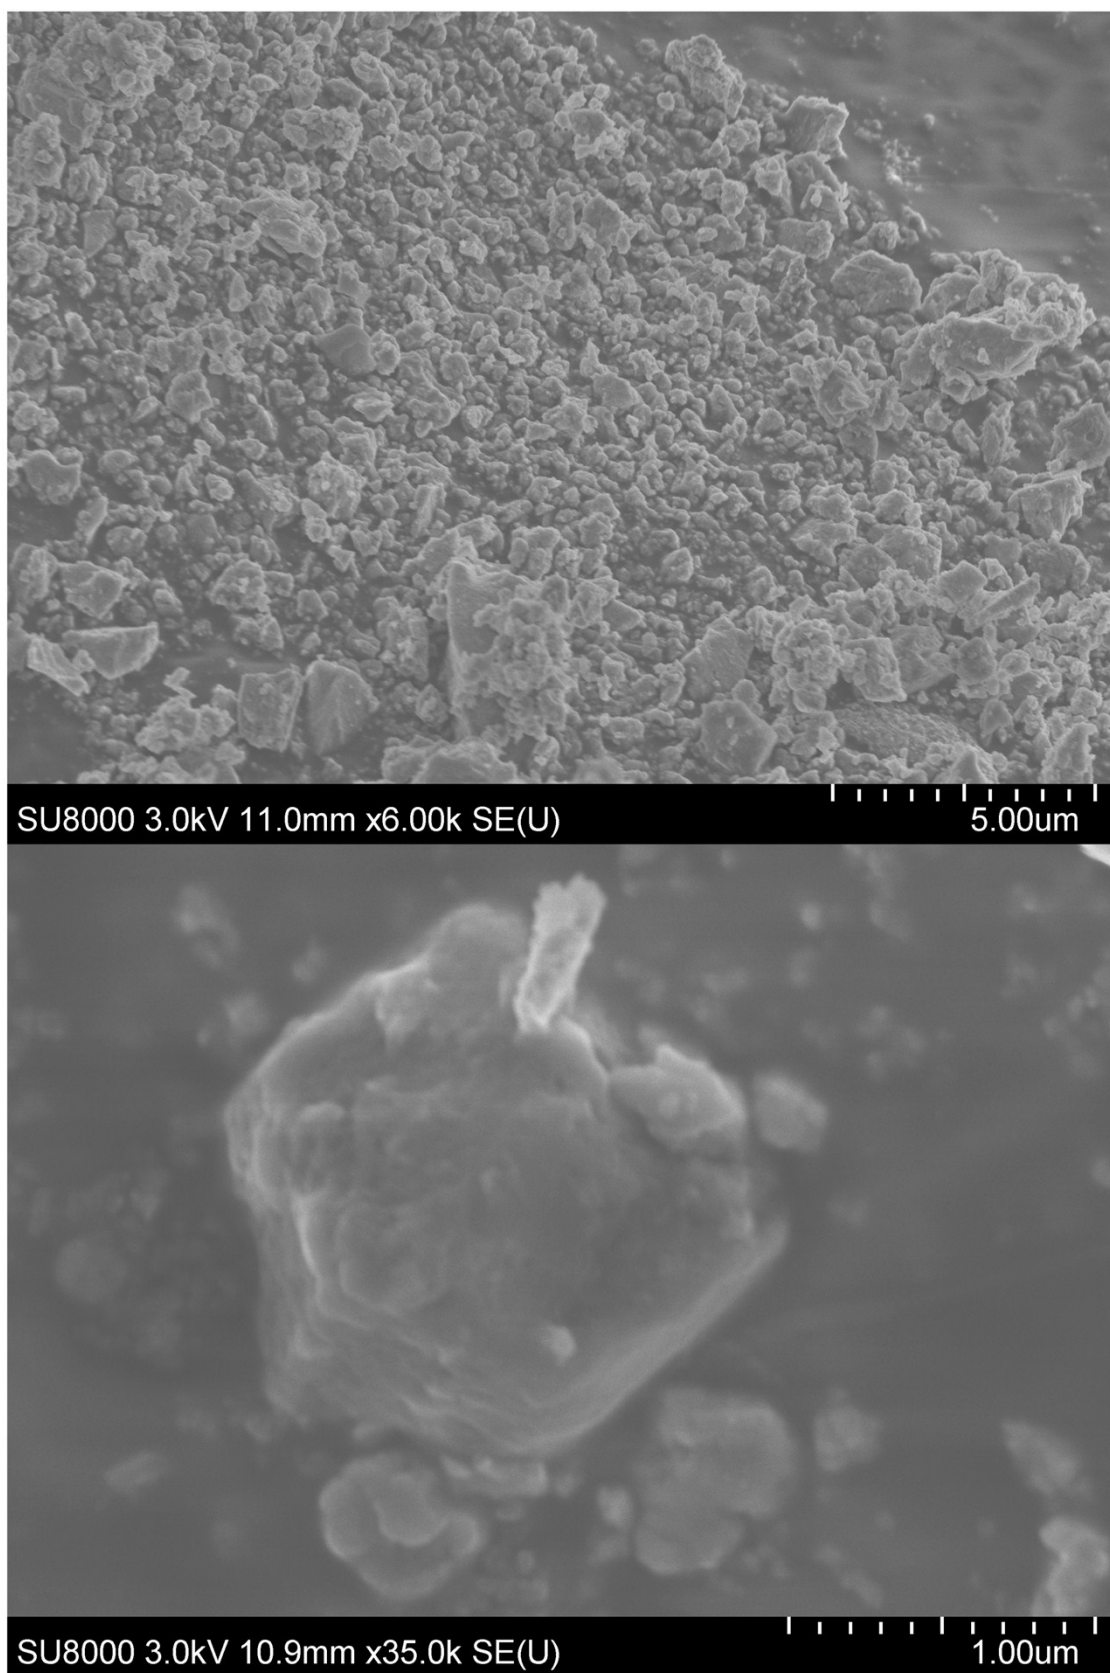

**Figure.S2** The SEM images of ZIF-8@Ru.

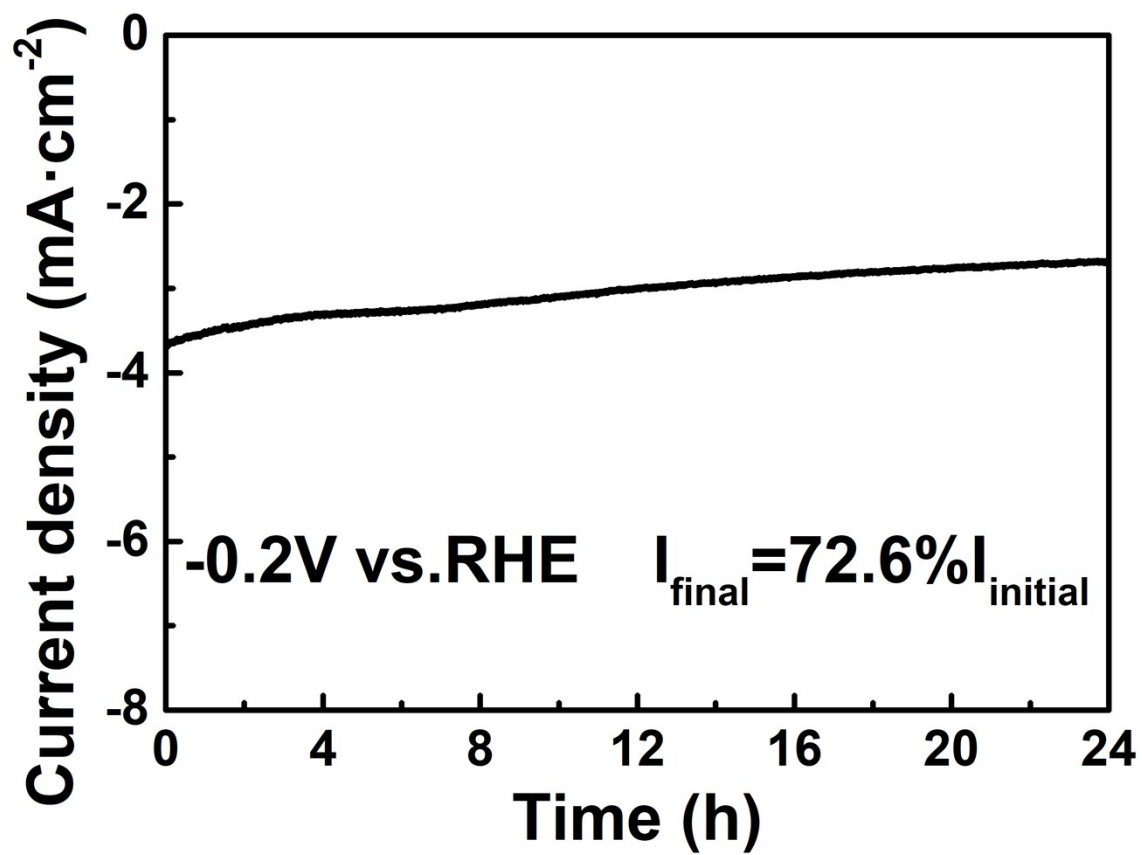

**Figure.S3** The current density of NC@Ru-5 electrode during electrolysis in N<sub>2</sub>-saturated 0.1M KOH electrolyte at -0.2V vs. RHE for 24h.
